# Supplementary material for: Rational design, crystal structure, and frustrated magnetism of the Ge-containing YbFe2O4-type layered oxides In2Zn3−xCoxGeO8 (0 ≤ x ≤ 3)
Source: Royal Society of Chemistry journal article supplement (doi:10.1039/d3dt01293j), 2023-01-01
Supplement: d3dt01293j1.pdf [file d3dt01293j1.pdf]

Supporting Information for

## Rational design, crystal structure, and frustrated magnetism of the Ge-containing YbFe<sub>2</sub>O<sub>4</sub>-type layered oxides In<sub>2</sub>Zn<sub>3-x</sub>Co<sub>x</sub>GeO<sub>8</sub> (0 ≤ x ≤ 3)

Yuhan Wu, Pengfei Jiang,\* Tao Yang\*

College of Chemistry and Chemical Engineering, Chongqing University, Chongqing 401331, China.

\*Corresponding authors: pengfeijiang@cqu.edu.cn; taoyang@cqu.edu.cn.

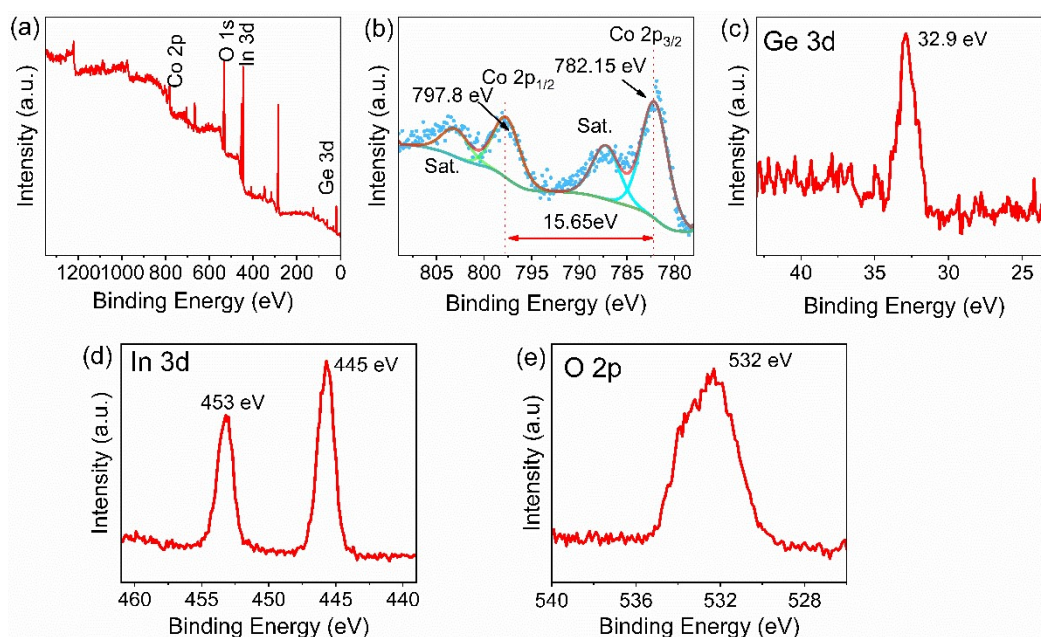

**Fig. S1** (a) The survey XPS of In<sub>2</sub>Co<sub>3</sub>GeO<sub>8</sub>. XPS spectra of Co 2p (b), Ge 3d (c), In 3d (d), and O 2p (e).

**Table S1.** Crystallographic data for  $\text{In}_3\text{Zn}_{4.5}\text{Ge}_{1.5}\text{O}_{12}$ ,  $\text{In}_3\text{Zn}_3\text{Co}_{1.5}\text{Ge}_{1.5}\text{O}_{12}$ ,  $\text{In}_3\text{Zn}_{1.5}\text{Co}_3\text{Ge}_{1.5}\text{O}_{12}$  and  $\text{In}_3\text{Co}_{4.5}\text{Ge}_{1.5}\text{O}_{12}$ , corresponding to  $\text{In}_2\text{Zn}_{3-x}\text{Co}_x\text{GeO}_8$  with  $x = 0, 1, 2,$  and  $3,$  respectively.

| parameters                               |                                                          |                                                                     |                                                                     |                                                          |
|------------------------------------------|----------------------------------------------------------|---------------------------------------------------------------------|---------------------------------------------------------------------|----------------------------------------------------------|
| temperature (K)                          | 300                                                      |                                                                     |                                                                     |                                                          |
| formula                                  | $\text{In}_3\text{Zn}_{4.5}\text{Ge}_{1.5}\text{O}_{12}$ | $\text{In}_3\text{Zn}_3\text{Co}_{1.5}\text{Ge}_{1.5}\text{O}_{12}$ | $\text{In}_3\text{Zn}_{1.5}\text{Co}_3\text{Ge}_{1.5}\text{O}_{12}$ | $\text{In}_3\text{Co}_{4.5}\text{Ge}_{1.5}\text{O}_{12}$ |
| formula weight<br>(g mol <sup>-1</sup> ) | 939.747                                                  | 930.034                                                             | 920.320                                                             | 910.606                                                  |
| crystal system                           | Trigonal                                                 |                                                                     |                                                                     |                                                          |
| Space group<br>(No.)                     | $R\bar{3}m$ (166)                                        |                                                                     |                                                                     |                                                          |
| wavelength (Å)                           | 1.54059                                                  |                                                                     |                                                                     |                                                          |
| $d$ spacing range                        | 0.82–8.8                                                 | 0.82–8.8                                                            | 0.82–8.8                                                            | 0.82–8.8                                                 |
| density (g cm <sup>-3</sup> )            | 6.300(4)                                                 | 6.216(3)                                                            | 6.154(4)                                                            | 6.113(6)                                                 |
| unit cell<br>dimensions                  | $a = b =$<br>3.2989(1)<br>$c = 26.3198(7)$               | $a = b =$<br>3.30826(7)<br>$c = 26.2143(6)$                         | $a = b =$<br>3.31488(6)<br>$c = 26.0974(5)$                         | $a = b =$<br>3.3159 (1)<br>$c = 25.9718(5)$              |
| $V$                                      | 248.06(2)                                                | 248.47(1)                                                           | 248.47(1)                                                           | 247.30(2)                                                |
| $Z$                                      | 1                                                        | 1                                                                   | 1                                                                   | 1                                                        |
| no. of reflections                       | 85                                                       | 85                                                                  | 85                                                                  | 85                                                       |
| no. of<br>parameters                     | 36                                                       | 42                                                                  | 42                                                                  | 36                                                       |
| no. of constrains                        | 6                                                        | 10                                                                  | 10                                                                  | 6                                                        |
| $R_{\text{wp}}$                          | 7.95%                                                    | 2.68%                                                               | 2.12%                                                               | 2.23                                                     |
| $R_{\text{p}}$                           | 5.89%                                                    | 1.94%                                                               | 1.26%                                                               | 1.75                                                     |
| goodness of fit                          | 1.78                                                     | 1.40                                                                | 2.36                                                                | 1.12                                                     |

**Table S2.** Atomic coordinates, site occupancy factors (*sof.*), and isotropic thermal displacement factors for  $\text{In}_2\text{Zn}_{3-x}\text{Co}_x\text{GeO}_8$  ( $x = 1$  and  $2$ ) obtained from Rietveld refinements against PXRD data.

| $x = 1$ | Site | $x$ | $y$ | $z$        | <i>sof.</i> | $B_{\text{iso.}}$ ( $\text{\AA}^2$ ) |
|---------|------|-----|-----|------------|-------------|--------------------------------------|
| In1     | 3a   | 0   | 0   | 0          | 0.897(1)    | 0.14(1)                              |
| Zn1     | 3a   | 0   | 0   | 0          | 0.069(1)    | 0.14(1)                              |
| Co1     | 3a   | 0   | 0   | 0          | 0.034(1)    | 0.14(1)                              |
| Zn2     | 6c   | 2/3 | 1/3 | 0.11563(2) | 0.4656(5)   | 0.82(2)                              |
| In2     | 6c   | 2/3 | 1/3 | 0.11563(2) | 0.0516(7)   | 0.82(2)                              |
| Co2     | 6c   | 2/3 | 1/3 | 0.11563(2) | 0.2328(2)   | 0.82(2)                              |
| Ge1     | 6c   | 2/3 | 1/3 | 0.11563(2) | 0.25        | 0.72(5)                              |
| O1      | 6c   | 0   | 0   | 0.13035(9) | 1           | 1.30(8)                              |
| O2      | 6c   | 2/3 | 1/3 | 0.0388(1)  | 1           | 0.47(6)                              |
| <hr/>   |      |     |     |            |             |                                      |
| $x = 2$ |      |     |     |            |             |                                      |
| In1     | 3a   | 0   | 0   | 0          | 0.935(2)    | 0.27(2)                              |
| Zn1     | 3a   | 0   | 0   | 0          | 0.022(1)    | 0.27(2)                              |
| Co1     | 3a   | 0   | 0   | 0          | 0.043(2)    | 0.27(2)                              |
| Co2     | 6c   | 2/3 | 1/3 | 0.11598(3) | 0.4784(5)   | 0.58(3)                              |
| In2     | 6c   | 2/3 | 1/3 | 0.11598(3) | 0.0326(8)   | 0.58(3)                              |
| Zn2     | 6c   | 2/3 | 1/3 | 0.11598(3) | 0.2390(3)   | 0.58(3)                              |
| Ge1     | 6c   | 2/3 | 1/3 | 0.11598(3) | 0.25        | 0.58(3)                              |
| O1      | 6c   | 0   | 0   | 0.1308(1)  | 1           | 1.3(1)                               |
| O2      | 6c   | 2/3 | 1/3 | 0.0403(2)  | 1           | 0.30(9)                              |

**Table S3.** Selected interatomic bond lengths of  $\text{In}_2\text{Zn}_{3-x}\text{Co}_x\text{GeO}_8$  ( $0 \leq x \leq 3$ ).

| $\text{In}_2\text{Zn}_3\text{GeO}_8$   |           |              |          |
|----------------------------------------|-----------|--------------|----------|
| In-O2 ( $\times 6$ )                   | 2.170(2)  | <i>M</i> -O2 | 1.997(3) |
| <i>M</i> -O1 ( $\times 3$ )            | 1.9358(6) | <i>M</i> -O1 | 2.356(3) |
| $\text{In}_2\text{Zn}_2\text{CoGeO}_8$ |           |              |          |
| In-O2 ( $\times 6$ )                   | 2.164(2)  | <i>M</i> -O2 | 2.014(3) |
| <i>M</i> -O1 ( $\times 3$ )            | 1.9486(5) | <i>M</i> -O1 | 2.290(2) |
| $\text{In}_2\text{ZnCo}_2\text{GeO}_8$ |           |              |          |
| In-O2 ( $\times 6$ )                   | 2.184(2)  | <i>M</i> -O2 | 1.975(4) |
| <i>M</i> -O1 ( $\times 3$ )            | 1.9523(7) | <i>M</i> -O1 | 2.260(3) |
| $\text{In}_2\text{Co}_3\text{GeO}_8$   |           |              |          |
| In-O2 ( $\times 6$ )                   | 2.205(4)  | <i>M</i> -O2 | 1.917(8) |
| <i>M</i> -O1 ( $\times 3$ )            | 1.964(1)  | <i>M</i> -O1 | 2.194(5) |
